# Supplementary material
Source: PubMed Central journal article supplement (PMC4509831)
Supplement: NIHMS684188-supplement-1.pdf [file NIHMS684188-supplement-1.pdf]

## Supplemental File 1

### Supplemental Table 1

Tools used for comparing WES versus RNA-Seq data.

| Method/tool | Purpose                                                           | URL                                                                                                                               |
|-------------|-------------------------------------------------------------------|-----------------------------------------------------------------------------------------------------------------------------------|
| FASTQC      | Check quality of WES and RNA-Seq reads                            | <a href="http://www.bioinformatics.babraham.ac.uk/projects/fastqc/">http://www.bioinformatics.babraham.ac.uk/projects/fastqc/</a> |
| BWA         | Map WES reads to the reference genome                             | <a href="http://bio-bwa.sourceforge.net/">http://bio-bwa.sourceforge.net/</a>                                                     |
| Picard      | Mark duplicate WES reads                                          | <a href="http://broadinstitute.github.io/picard/">http://broadinstitute.github.io/picard/</a>                                     |
| GATK        | Perform local realignment and recalibration of WES reads          | <a href="https://www.broadinstitute.org/gatk/">https://www.broadinstitute.org/gatk/</a>                                           |
| MuTect      | Detect SNVs in WES and RNA-Seq                                    | <a href="http://www.broadinstitute.org/cancer/cga/mutect">http://www.broadinstitute.org/cancer/cga/mutect</a>                     |
| Samtools    | Generate mpileup files for WES and RNA-Seq                        | <a href="http://samtools.sourceforge.net/">http://samtools.sourceforge.net/</a>                                                   |
| VarScan2    | Generate read counts for WES and RNA-Seq                          | <a href="http://varscan.sourceforge.net/">http://varscan.sourceforge.net/</a>                                                     |
| TopHat2     | Map RNA-Seq reads to the human reference transcriptome and genome | <a href="http://ccb.jhu.edu/software/tophat/index.shtml">http://ccb.jhu.edu/software/tophat/index.shtml</a>                       |
| Cufflinks   | Calculate FPKM gene expression levels for RNA-Seq                 | <a href="https://github.com/cole-trapnell-lab/cufflinks">https://github.com/cole-trapnell-lab/cufflinks</a>                       |
| Bedtools    | Intersect RNA-Seq SNVs with WES capture kit                       | <a href="https://github.com/arq5x/bedtools2">https://github.com/arq5x/bedtools2</a>                                               |
| Oncotator   | Annotations for strand analysis of WES SNVs                       | <a href="http://www.broadinstitute.org/oncotator/">http://www.broadinstitute.org/oncotator/</a>                                   |
| R           | Perform the analysis for SNV comparisons                          | <a href="http://www.r-project.org/">http://www.r-project.org/</a>                                                                 |

This table summarizes the computational tools used in our WES versus RNA-Seq comparative analysis. We include each tool used in our analysis, our use for the tool, and the URL link to the website. Further details including citations for all tools listed above are in the main methods section of the text.
